# Supplementary material for: Free radical polymerization of alkyl methacrylates with N,N-dimethylanilinium p-toluenesulfonate at above ambient temperature: a quasi-living system
Source: Royal Society of Chemistry journal article supplement (doi:10.1039/c0py00180e), 2010-01-01
Supplement: c0py00180e.pdf [file c0py00180e.pdf]

## Electronic Supplementary Information

### Free Radical Polymerization of Alkyl Methacrylates with N,N-Dimethylanilinium *p*-Toluenesulfonate at Above Ambient Temperature: A Quasi Living System

Atanu Kotal<sup>1</sup>, Tapas K. Paira<sup>1</sup>, Sanjib Banerjee<sup>1</sup>, Chinmoy Bhattacharya<sup>2</sup> and Tarun K. Mandal<sup>1</sup>

<sup>1</sup>*Polymer Science Unit, Indian Association for the Cultivation of Science, Jadavpur, Kolkata-700032, India.*

<sup>2</sup>*Austin Paints and Chemicals, 3, Ambica Mukherjee Road, Kolkata-700056, India.*

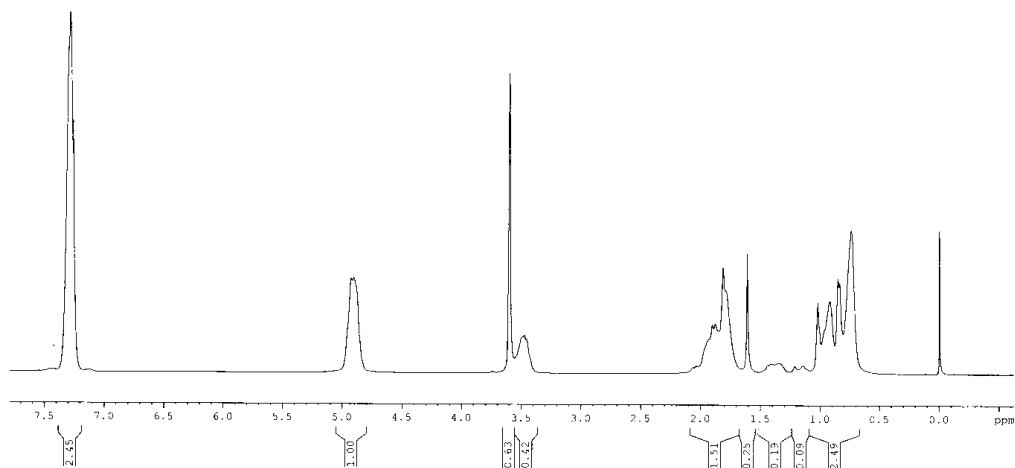

**Figure S1.** <sup>1</sup>H NMR spectra of the block copolymer P(MMA)-b-P(BzMA-co-MMA) synthesized by PTSA-DMA initiator

### Calculation of $M_n$ of P(MMA)-b-P(BzMA-co-MMA)

$M_n$  of P(MMA)-b-P(BzMA-co-MMA) was calculated by using the following equation<sup>1</sup> :

$$M_{n, cal} = [M_{n, emp} + \{(M_{n, emp} / MW_{MMA}) (1 - F_{MMA}) / (F_{MMA} - f_{MMA})\} \times \{(f_{MMA} MW_{MMA}) + (1 - f_{MMA}) MW_{BzMA}\}]$$

Where,  $M_{n, emp}$  is the experimentally determined molecular weight of the first block,

$MW_{MMA}$  and  $MW_{BzMA}$  are the molar masses of the two monomers,

$f_{MMA}$  is the mole fraction of MMA in the monomer feed during the second step (assuming no compositional drift),

$F_{MMA}$  is the cumulative mole fraction of MMA in the copolymer determined by NMR.

In our case,  $M_{n, emp} = 28000$  ( $M_n$  of the first block i.e. PMMA measured by GPC),

$MW_{MMA} = 100$ ,  $MW_{BzMA} = 176.22$ ,  $f_{MMA} = [1.17 / (1.1 + 5.59)] = 0.16$ ,  $F_{MMA} = 0.51$ ,

Then  $M_{n, cal}$  of P(MMA)-b-P(BzMA-co-MMA) = 92000.

### Reference

- (1) Angot, S.; Ayres, N.; Bon, S. A. F.; Haddleton, D. M. *Macromolecules* **2001**, *34*, 768-774.
